# Supplementary material
Source: PubMed Central journal article supplement (PMC5290293)

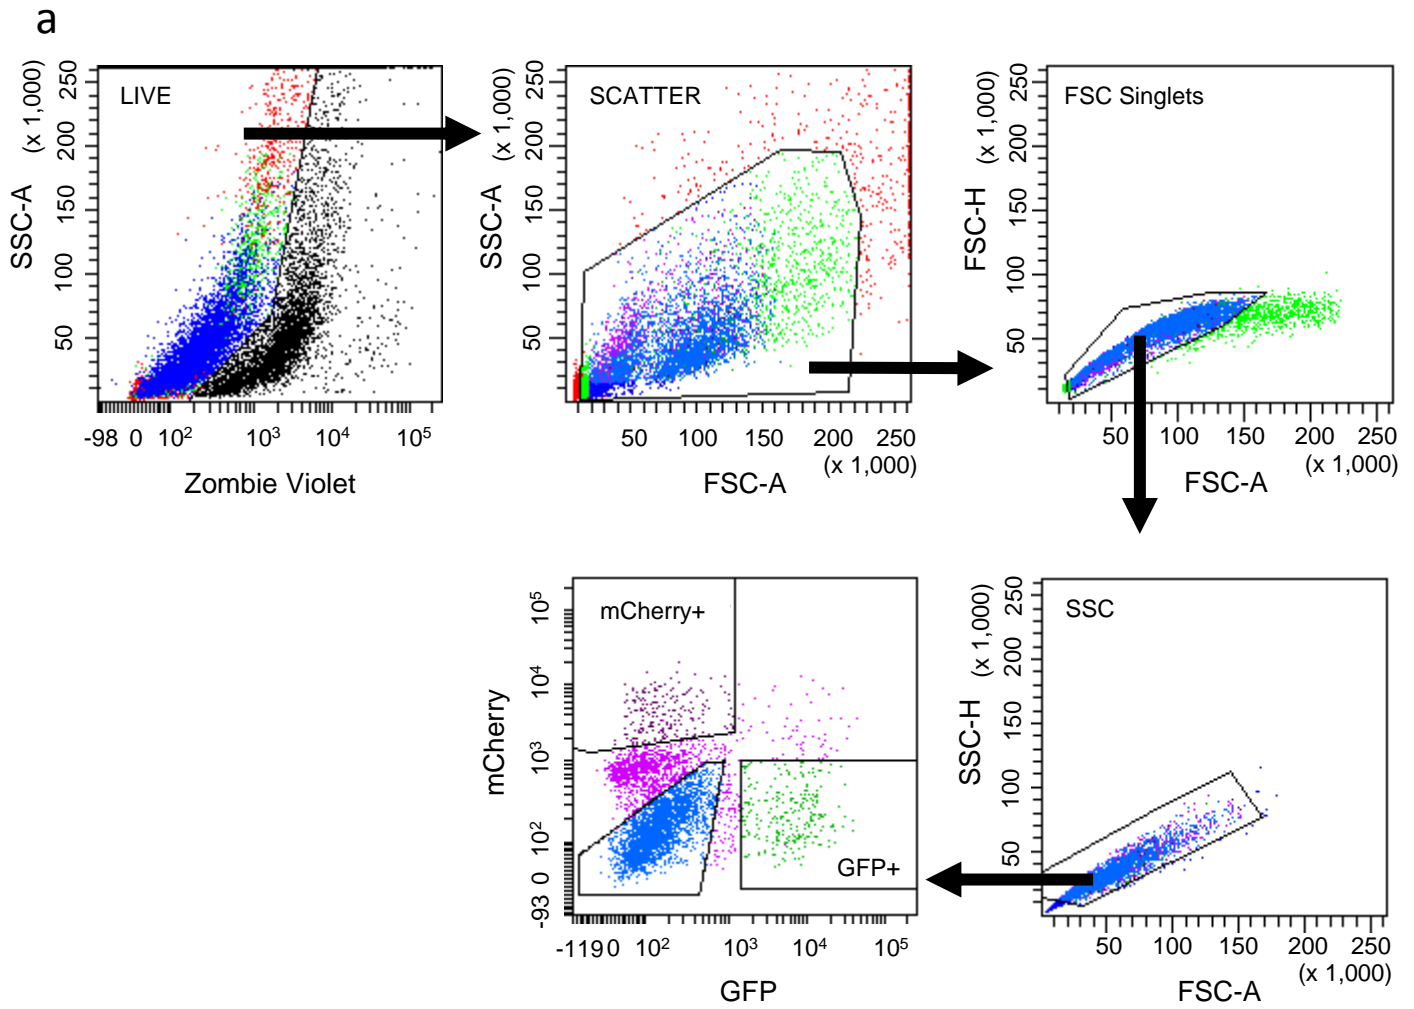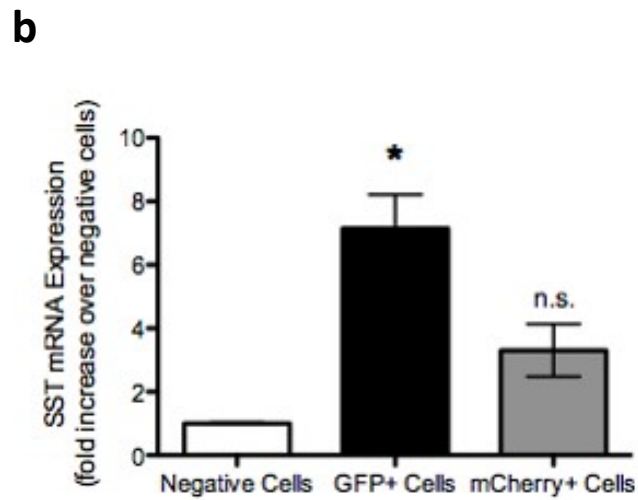

Supplementary Figure 1

Supplement: NIHMS797571-supplement-2.pdf [file NIHMS797571-supplement-2.pdf]

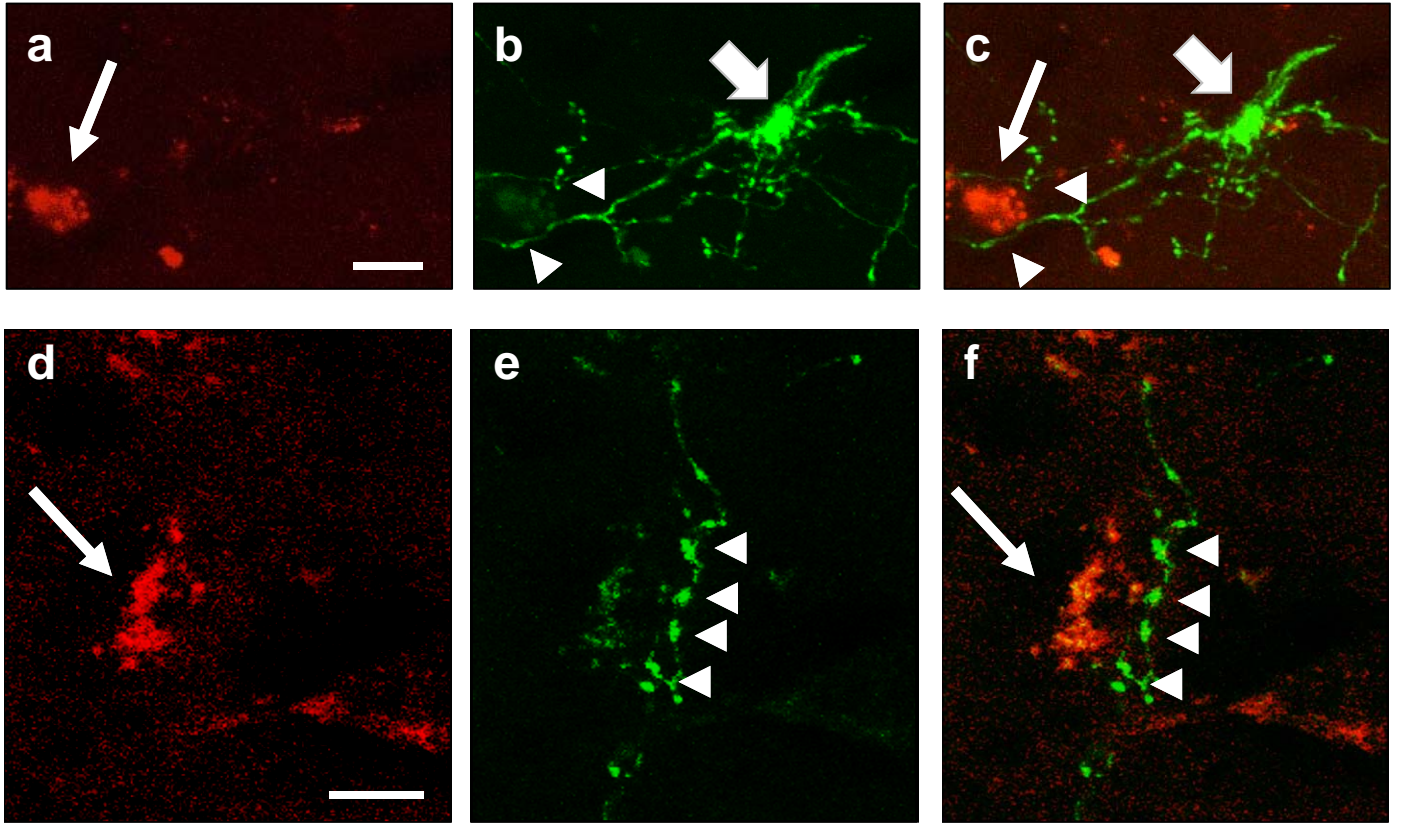

**Supplementary Figure 2**

Supplement: NIHMS797571-supplement-3.pdf [file NIHMS797571-supplement-3.pdf]

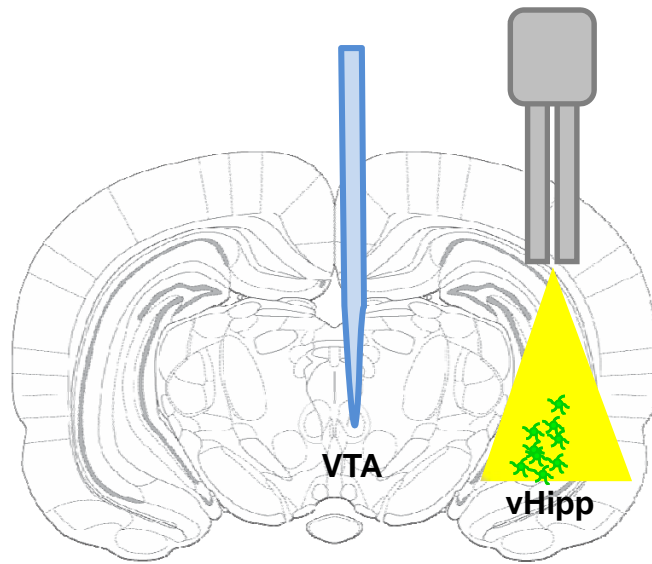

**Supplementary Figure 3**

Supplement: NIHMS797571-supplement-4.pdf [file NIHMS797571-supplement-4.pdf]

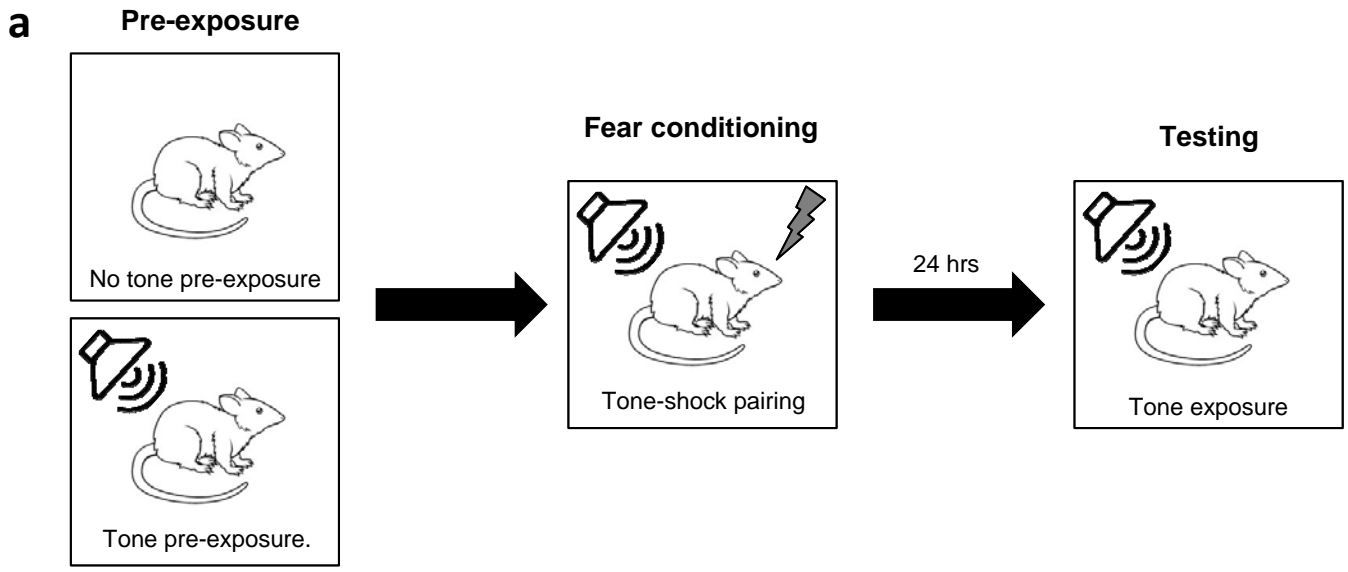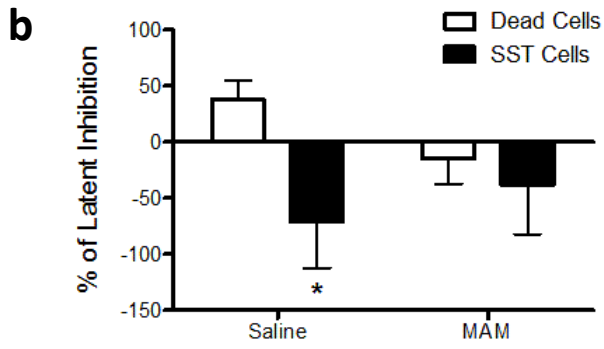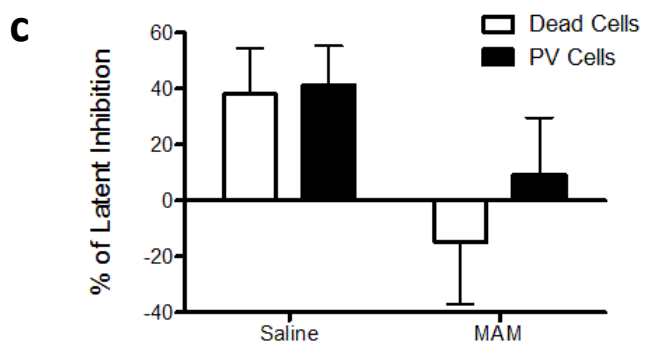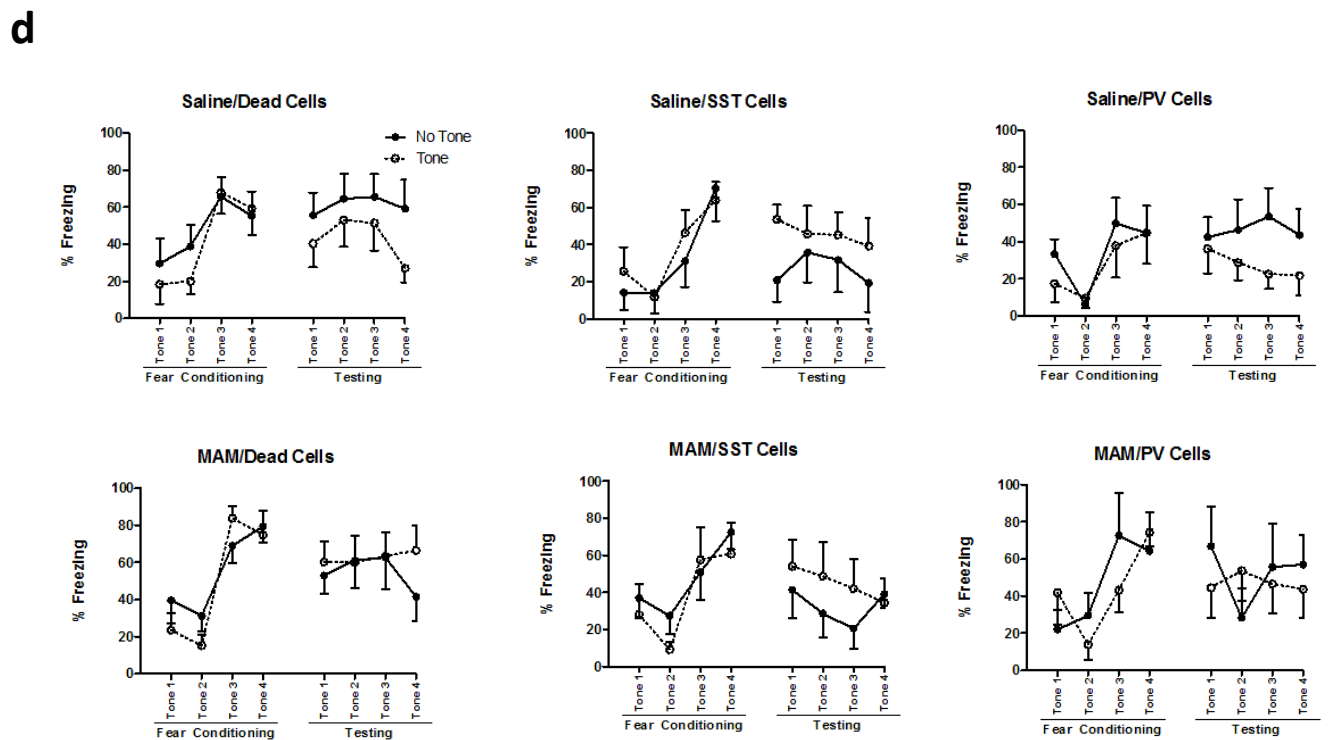

**Supplementary Figure 4**

Supplement: NIHMS797571-supplement-5.pdf [file NIHMS797571-supplement-5.pdf]
